# Supplementary material
Source: PubMed Central journal article supplement (PMC2923872)
Supplement: pp.110.158238_1.pdf [file pp.110.158238_1.pdf]

## Supplemental Data

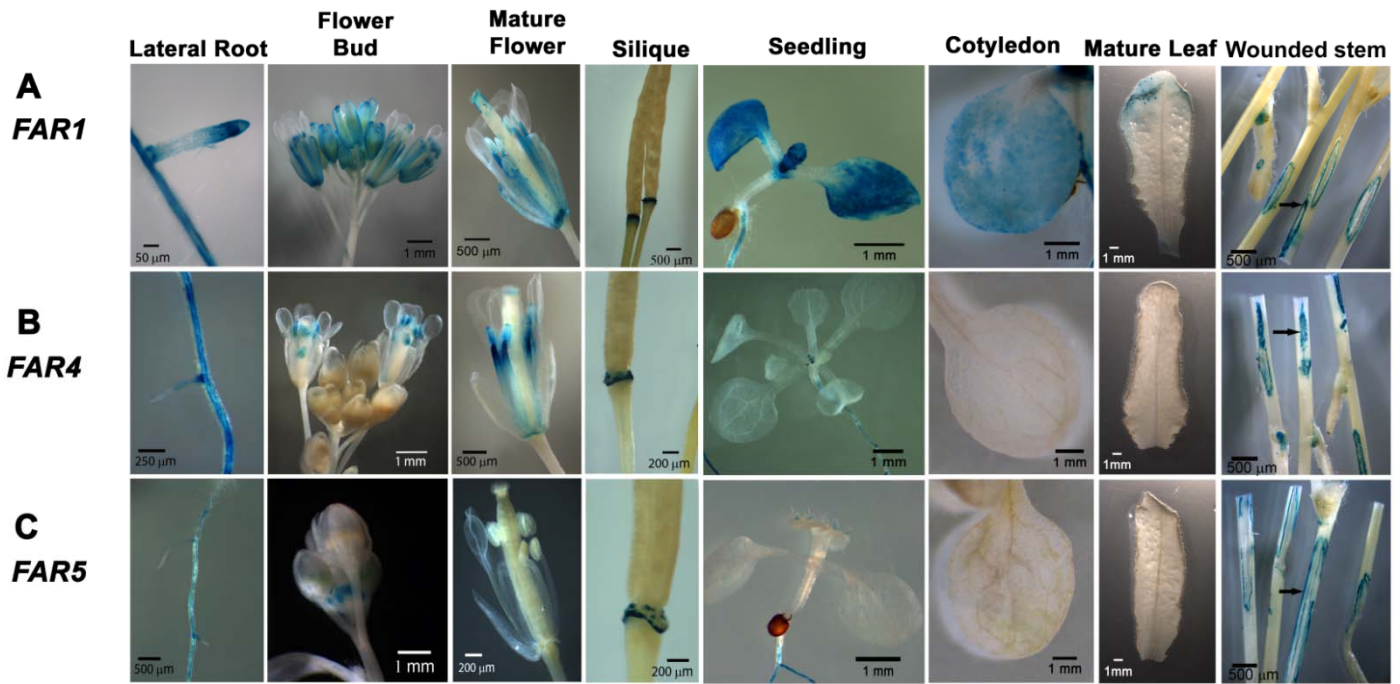

**Supplemental Figure S1.** Expression patterns of *FAR1* (A), *FAR4* (B), and *FAR5* (C) detected in transgenic promoter:GUS lines. Roots, whole seedlings, and cotyledons were collected from 1-2 week old seedlings grown on vertical plates in tissue culture. Young and mature flowers, siliques, and mature leaves were taken from adult plants grown on soil. The stems of 6-week-old plants were slit with a needle and stained for GUS activity 24 hours after wounding.

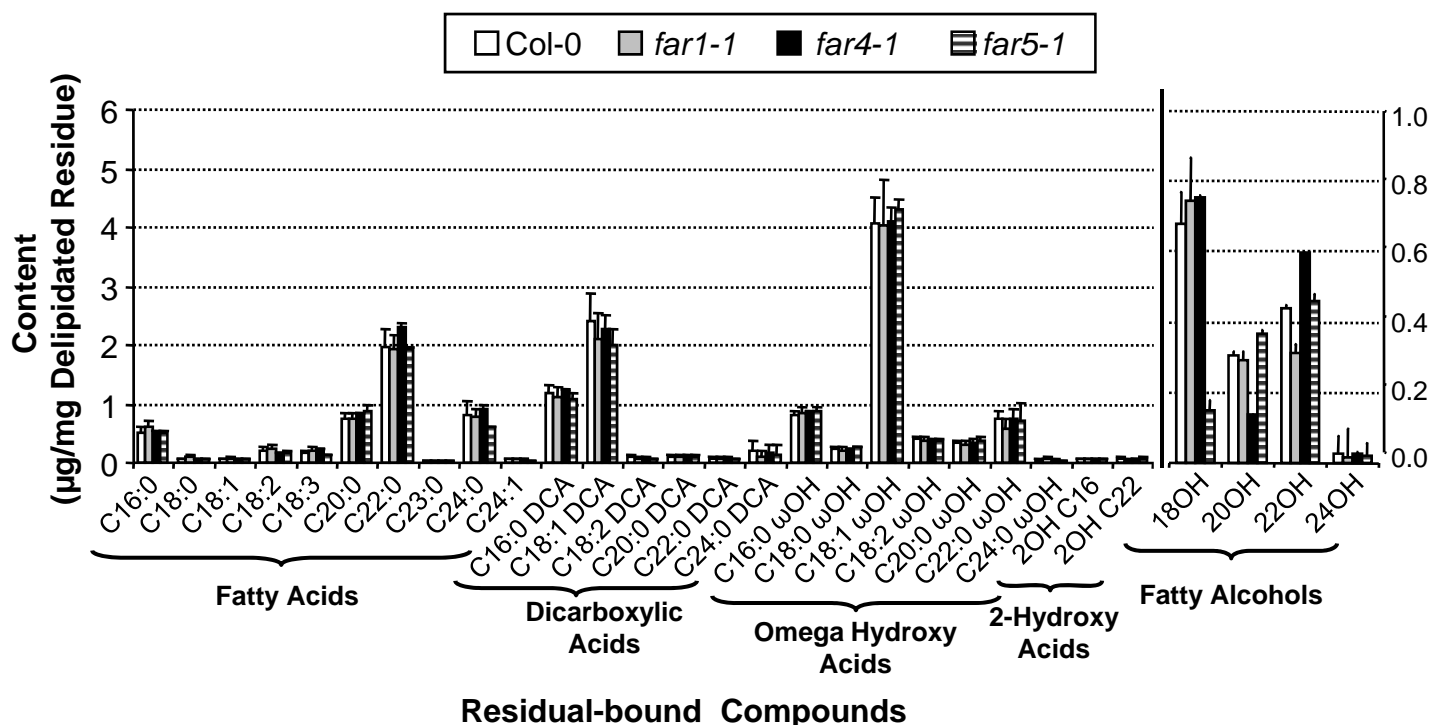

**Supplemental Figure S2.** Aliphatic suberin composition in roots of tissue culture-grown wild-type, *far1-1*, *far4-1*, and *far5-1* plants. Suberin monomer composition sorted by chain length and compound class along the x-axis. The amounts of fatty alcohols reported are at a different scale (right side of panel) than the other components (left side of panel). All values are the means shown in µg/mg delipidated dry residue (DR) of residue + SD of three to five replicates.

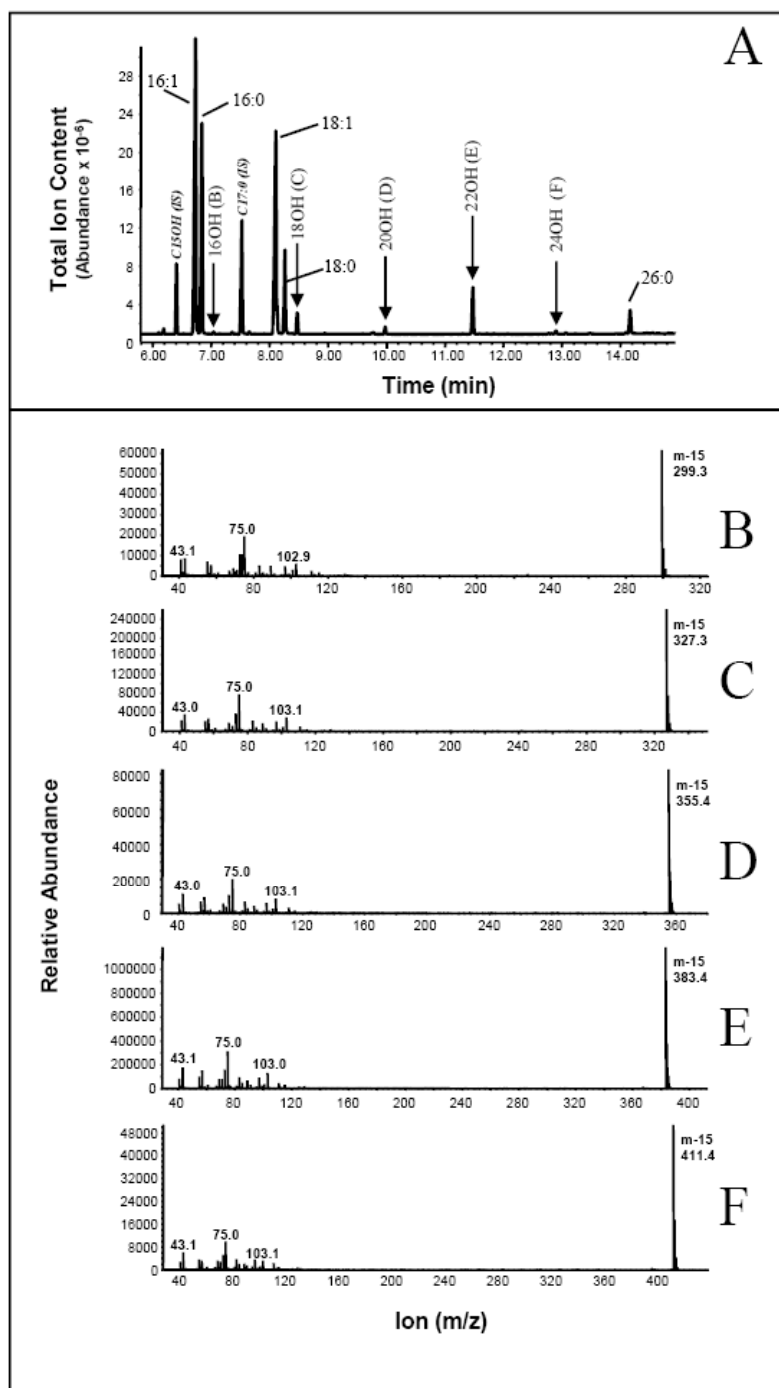

**Supplemental Figure S3.** Identification by gas chromatography-mass spectrometry of primary fatty alcohols produced in transgenic yeast expressing Arabidopsis FAR1. (A) Gas chromatogram of acyl-chains extracted from yeast expressing FAR1. Yeast cells were pelleted by centrifugation and directly trimethylsilylated. Hydroxyl groups were trimethylsilylated (TMS) before separation by gas chromatography and detection of ions with a mass spectrometer. The peaks corresponding to the internal standards (IS) pentadecanol (C15:0-O-TMS) and heptadecanoic acid methyl ester (C17:0) are indicated. Also indicated, the C16:1, C16:0, C18:1, C18:0, and C26:0 fatty acid methyl esters peaks, and the C16:0-O-TMS (B), C18:0-O-TMS (C), C20:0-O-TMS (D), C22:0-O-TMS (E), and C24:0-O-TMS (F) derivatized primary fatty alcohol peaks. (B-F) Mass spectra of derivatized primary fatty alcohol peaks indicated in panel (A).

**Supplemental Table S1. Fatty Acyl-CoA Reductase (FAR) genes in *Arabidopsis thaliana***

| Gene Names  | Names in the literature | Arabidopsis loci | References                                |
|-------------|-------------------------|------------------|-------------------------------------------|
| <i>FAR1</i> |                         | At5g22500        | Doan et al., 2008<br>This study           |
| <i>FAR2</i> | <i>MS2</i>              | At3g11980        | Aarts et al., 1997<br>Doan et al., 2008   |
| <i>FAR3</i> | <i>CER4</i>             | At4g33790        | Rowland et al., 2006<br>Doan et al., 2008 |
| <i>FAR4</i> |                         | At3g44540        | This study                                |
| <i>FAR5</i> |                         | At3g44550        | This study                                |
| <i>FAR6</i> |                         | At3g56700        | Doan et al., 2008                         |
| <i>FAR7</i> |                         | At5g22420        | Doan et al., 2008                         |
| <i>FAR8</i> |                         | At3g44560        | Doan et al., 2008                         |

**Supplemental Table S2.** *Composition of residual bound lipids in whole roots of soil-grown wild-type, far1, far4, and far5 plants*Each value is the mean shown in  $\mu\text{g}/\text{mg}$  delipidated dry weight of residue  $\pm$  SD of five biological replicates.

|                                          | WT               | <i>far1-1</i>    | <i>far1-2</i>    | <i>far4-1</i>    | <i>far4-2</i>    | <i>far5-1</i>    | <i>far5-2</i>    |
|------------------------------------------|------------------|------------------|------------------|------------------|------------------|------------------|------------------|
| <b>Fatty Acids</b>                       |                  |                  |                  |                  |                  |                  |                  |
| C16:0                                    | 0.32 $\pm$ 0.03  | 0.27 $\pm$ 0.04  | 0.30 $\pm$ 0.03  | 0.32 $\pm$ 0.06  | 0.32 $\pm$ 0.07  | 0.38 $\pm$ 0.19  | 0.32 $\pm$ 0.09  |
| C18:0                                    | 0.05 $\pm$ 0.01  | 0.04 $\pm$ 0.00  | 0.06 $\pm$ 0.01  | 0.08 $\pm$ 0.04  | 0.05 $\pm$ 0.01  | 0.10 $\pm$ 0.07  | 0.07 $\pm$ 0.01  |
| C18:1                                    | 0.06 $\pm$ 0.01  | 0.04 $\pm$ 0.01  | 0.04 $\pm$ 0.00  | 0.07 $\pm$ 0.03  | 0.05 $\pm$ 0.02  | 0.07 $\pm$ 0.02  | 0.06 $\pm$ 0.02  |
| C18:2                                    | 0.27 $\pm$ 0.06  | 0.20 $\pm$ 0.06  | 0.17 $\pm$ 0.08  | 0.23 $\pm$ 0.05  | 0.23 $\pm$ 0.09  | 0.25 $\pm$ 0.11  | 0.26 $\pm$ 0.12  |
| C18:3                                    | 0.17 $\pm$ 0.04  | 0.14 $\pm$ 0.04  | 0.13 $\pm$ 0.05  | 0.22 $\pm$ 0.08  | 0.17 $\pm$ 0.06  | 0.21 $\pm$ 0.11  | 0.21 $\pm$ 0.05  |
| C20:0                                    | 0.39 $\pm$ 0.08  | 0.36 $\pm$ 0.14  | 0.38 $\pm$ 0.04  | 0.49 $\pm$ 0.04  | 0.47 $\pm$ 0.11  | 0.59 $\pm$ 0.07  | 0.49 $\pm$ 0.15  |
| C22:0                                    | 1.08 $\pm$ 0.14  | 0.87 $\pm$ 0.22  | 0.77 $\pm$ 0.07  | 1.02 $\pm$ 0.21  | 1.07 $\pm$ 0.19  | 1.28 $\pm$ 0.03  | 1.19 $\pm$ 0.06  |
| C23:0                                    | 0.04 $\pm$ 0.01  | 0.02 $\pm$ 0.00  | 0.02 $\pm$ 0.01  | 0.03 $\pm$ 0.00  | 0.03 $\pm$ 0.01  | 0.03 $\pm$ 0.01  | 0.03 $\pm$ 0.01  |
| C24:0                                    | 0.30 $\pm$ 0.10  | 0.21 $\pm$ 0.02  | 0.17 $\pm$ 0.07  | 0.21 $\pm$ 0.06  | 0.26 $\pm$ 0.11  | 0.27 $\pm$ 0.09  | 0.35 $\pm$ 0.09  |
| C24:1                                    | 0.03 $\pm$ 0.00  | 0.02 $\pm$ 0.00  | 0.02 $\pm$ 0.01  | 0.02 $\pm$ 0.00  | 0.03 $\pm$ 0.00  | 0.03 $\pm$ 0.01  | 0.03 $\pm$ 0.00  |
| C25:0                                    | 0.02 $\pm$ 0.00  | 0.01 $\pm$ 0.01  | 0.01 $\pm$ 0.00  | 0.04 $\pm$ 0.05  | 0.01 $\pm$ 0.01  | 0.02 $\pm$ 0.01  | 0.01 $\pm$ 0.00  |
| C26:0                                    | 0.02 $\pm$ 0.01  | 0.03 $\pm$ 0.02  | 0.02 $\pm$ 0.01  | 0.03 $\pm$ 0.01  | 0.02 $\pm$ 0.02  | 0.02 $\pm$ 0.02  | 0.04 $\pm$ 0.01  |
| C28:0                                    | 0.01 $\pm$ 0.00  | 0.02 $\pm$ 0.00  | 0.01 $\pm$ 0.00  | 0.01 $\pm$ 0.01  | 0.01 $\pm$ 0.01  | 0.00 $\pm$ 0.00  | 0.01 $\pm$ 0.01  |
| <b>Dicarboxylic Acids</b>                |                  |                  |                  |                  |                  |                  |                  |
| C16:0 DCA                                | 0.65 $\pm$ 0.10  | 0.52 $\pm$ 0.17  | 0.55 $\pm$ 0.06  | 0.66 $\pm$ 0.09  | 0.65 $\pm$ 0.11  | 0.72 $\pm$ 0.07  | 0.65 $\pm$ 0.13  |
| C18:1 DCA                                | 1.50 $\pm$ 0.13  | 1.21 $\pm$ 0.38  | 1.11 $\pm$ 0.08  | 1.47 $\pm$ 0.32  | 1.45 $\pm$ 0.18  | 1.64 $\pm$ 0.07  | 1.48 $\pm$ 0.15  |
| C18:2 DCA                                | 0.10 $\pm$ 0.01  | 0.06 $\pm$ 0.01  | 0.04 $\pm$ 0.02  | 0.07 $\pm$ 0.03  | 0.08 $\pm$ 0.03  | 0.09 $\pm$ 0.03  | 0.20 $\pm$ 0.21  |
| C20:0 DCA                                | 0.10 $\pm$ 0.01  | 0.08 $\pm$ 0.02  | 0.07 $\pm$ 0.02  | 0.10 $\pm$ 0.02  | 0.09 $\pm$ 0.02  | 0.12 $\pm$ 0.01  | 0.09 $\pm$ 0.02  |
| C22:0 DCA                                | 0.11 $\pm$ 0.01  | 0.08 $\pm$ 0.03  | 0.06 $\pm$ 0.02  | 0.10 $\pm$ 0.04  | 0.10 $\pm$ 0.01  | 0.13 $\pm$ 0.01  | 0.10 $\pm$ 0.02  |
| <b><math>\omega</math>-Hydroxy Acids</b> |                  |                  |                  |                  |                  |                  |                  |
| C16:0 $\omega$ OH                        | 0.61 $\pm$ 0.14  | 0.57 $\pm$ 0.20  | 0.64 $\pm$ 0.08  | 0.71 $\pm$ 0.06  | 0.66 $\pm$ 0.16  | 0.78 $\pm$ 0.10  | 0.66 $\pm$ 0.24  |
| C18:0 $\omega$ OH                        | 0.16 $\pm$ 0.04  | 0.16 $\pm$ 0.07  | 0.17 $\pm$ 0.02  | 0.19 $\pm$ 0.02  | 0.19 $\pm$ 0.05  | 0.26 $\pm$ 0.05  | 0.20 $\pm$ 0.09  |
| C18:1 $\omega$ OH                        | 2.75 $\pm$ 0.46  | 2.65 $\pm$ 1.07  | 2.70 $\pm$ 0.20  | 3.17 $\pm$ 0.40  | 2.94 $\pm$ 0.71  | 3.62 $\pm$ 0.41  | 2.90 $\pm$ 1.01  |
| C18:2 $\omega$ OH                        | 0.24 $\pm$ 0.04  | 0.20 $\pm$ 0.07  | 0.20 $\pm$ 0.01  | 0.25 $\pm$ 0.02  | 0.25 $\pm$ 0.03  | 0.28 $\pm$ 0.03  | 0.23 $\pm$ 0.05  |
| C20:0 $\omega$ OH                        | 0.31 $\pm$ 0.06  | 0.28 $\pm$ 0.11  | 0.30 $\pm$ 0.03  | 0.37 $\pm$ 0.03  | 0.35 $\pm$ 0.08  | 0.45 $\pm$ 0.07  | 0.34 $\pm$ 0.12  |
| C20:1 $\omega$ OH                        | 0.02 $\pm$ 0.00  | 0.02 $\pm$ 0.01  | 0.02 $\pm$ 0.00  | 0.02 $\pm$ 0.01  | 0.02 $\pm$ 0.00  | 0.02 $\pm$ 0.00  | 0.02 $\pm$ 0.00  |
| C22:0 $\omega$ OH                        | 0.93 $\pm$ 0.08  | 0.77 $\pm$ 0.23  | 0.64 $\pm$ 0.07  | 0.90 $\pm$ 0.15  | 0.88 $\pm$ 0.15  | 1.09 $\pm$ 0.07  | 0.90 $\pm$ 0.19  |
| C24:0 $\omega$ OH                        | 0.09 $\pm$ 0.04  | 0.08 $\pm$ 0.04  | 0.04 $\pm$ 0.03  | 0.06 $\pm$ 0.02  | 0.06 $\pm$ 0.03  | 0.07 $\pm$ 0.05  | 0.11 $\pm$ 0.02  |
| C26:0 $\omega$ OH                        | 0.02 $\pm$ 0.01  | 0.04 $\pm$ 0.05  | 0.02 $\pm$ 0.01  | 0.02 $\pm$ 0.01  | 0.02 $\pm$ 0.01  | 0.02 $\pm$ 0.02  | 0.03 $\pm$ 0.01  |
| C28:0 $\omega$ OH                        | 0.01 $\pm$ 0.01  | 0.03 $\pm$ 0.03  | 0.00 $\pm$ 0.01  | 0.01 $\pm$ 0.01  | 0.01 $\pm$ 0.01  | 0.01 $\pm$ 0.01  | 0.02 $\pm$ 0.01  |
| <b>2-Hydroxy Acids</b>                   |                  |                  |                  |                  |                  |                  |                  |
| C16:0-2OH                                | 0.03 $\pm$ 0.01  | 0.03 $\pm$ 0.01  | 0.02 $\pm$ 0.01  | 0.03 $\pm$ 0.01  | 0.02 $\pm$ 0.01  | 0.03 $\pm$ 0.01  | 0.03 $\pm$ 0.01  |
| C22:0-2OH                                | 0.07 $\pm$ 0.03  | 0.07 $\pm$ 0.03  | 0.05 $\pm$ 0.03  | 0.05 $\pm$ 0.01  | 0.05 $\pm$ 0.03  | 0.07 $\pm$ 0.03  | 0.06 $\pm$ 0.04  |
| C23:0-2OH                                | 0.02 $\pm$ 0.01  | 0.02 $\pm$ 0.01  | 0.01 $\pm$ 0.01  | 0.02 $\pm$ 0.00  | 0.02 $\pm$ 0.01  | 0.02 $\pm$ 0.01  | 0.01 $\pm$ 0.01  |
| C24:0-2OH                                | 0.30 $\pm$ 0.13  | 0.32 $\pm$ 0.15  | 0.19 $\pm$ 0.13  | 0.21 $\pm$ 0.04  | 0.22 $\pm$ 0.15  | 0.28 $\pm$ 0.13  | 0.27 $\pm$ 0.17  |
| C24:1-2OH                                | 0.16 $\pm$ 0.03  | 0.17 $\pm$ 0.00  | 0.14 $\pm$ 0.04  | 0.16 $\pm$ 0.01  | 0.12 $\pm$ 0.03  | 0.17 $\pm$ 0.04  | 0.18 $\pm$ 0.01  |
| C25:0-2OH                                | 0.03 $\pm$ 0.01  | 0.02 $\pm$ 0.01  | 0.01 $\pm$ 0.01  | 0.02 $\pm$ 0.00  | 0.02 $\pm$ 0.01  | 0.02 $\pm$ 0.01  | 0.02 $\pm$ 0.01  |
| C25:1-2OH                                | 0.02 $\pm$ 0.01  | 0.02 $\pm$ 0.00  | 0.01 $\pm$ 0.01  | 0.03 $\pm$ 0.01  | 0.02 $\pm$ 0.00  | 0.02 $\pm$ 0.00  | 0.04 $\pm$ 0.04  |
| C26:0-2OH                                | 0.04 $\pm$ 0.02  | 0.04 $\pm$ 0.02  | 0.02 $\pm$ 0.02  | 0.03 $\pm$ 0.00  | 0.03 $\pm$ 0.02  | 0.03 $\pm$ 0.02  | 0.04 $\pm$ 0.03  |
| C26:1-2OH                                | 0.02 $\pm$ 0.00  | 0.02 $\pm$ 0.01  | 0.01 $\pm$ 0.01  | 0.02 $\pm$ 0.00  | 0.01 $\pm$ 0.01  | 0.02 $\pm$ 0.01  | 0.04 $\pm$ 0.04  |
| <b>Fatty Alcohols</b>                    |                  |                  |                  |                  |                  |                  |                  |
| C18:0-OH                                 | 0.35 $\pm$ 0.09  | 0.32 $\pm$ 0.14  | 0.46 $\pm$ 0.12  | 0.38 $\pm$ 0.02  | 0.38 $\pm$ 0.07  | 0.07 $\pm$ 0.03  | 0.07 $\pm$ 0.05  |
| C20:0-OH                                 | 0.19 $\pm$ 0.03  | 0.14 $\pm$ 0.04  | 0.15 $\pm$ 0.01  | 0.10 $\pm$ 0.01  | 0.19 $\pm$ 0.02  | 0.31 $\pm$ 0.05  | 0.32 $\pm$ 0.08  |
| C22:0-OH                                 | 0.18 $\pm$ 0.04  | 0.12 $\pm$ 0.02  | 0.12 $\pm$ 0.01  | 0.22 $\pm$ 0.00  | 0.20 $\pm$ 0.03  | 0.33 $\pm$ 0.05  | 0.29 $\pm$ 0.06  |
| C24:0-OH                                 | 0.02 $\pm$ 0.01  | 0.02 $\pm$ 0.00  |
| Unknowns                                 | 0.15 $\pm$ 0.06  | 0.11 $\pm$ 0.04  | 0.22 $\pm$ 0.16  | 0.34 $\pm$ 0.34  | 0.14 $\pm$ 0.03  | 0.17 $\pm$ 0.06  | 0.31 $\pm$ 0.27  |
| Total                                    | 11.91 $\pm$ 1.00 | 10.41 $\pm$ 2.39 | 10.11 $\pm$ 0.27 | 12.91 $\pm$ 0.48 | 11.91 $\pm$ 1.29 | 14.11 $\pm$ 0.55 | 12.73 $\pm$ 1.80 |

**Supplemental Table S3.** *Composition of residual bound lipids in seeds of wild-type, far1-1, far4-1, and far5-1 plants*

Each value is the mean shown in  $\mu\text{g}/\text{mg}$  delipidated dry weight of residue  $\pm$  SD of three biological replicates.

|                                          | WT                | <i>far1-1</i>     | <i>far4-1</i>      | <i>far5-1</i>     |
|------------------------------------------|-------------------|-------------------|--------------------|-------------------|
| <b>Aromatics</b>                         |                   |                   |                    |                   |
| <i>trans</i> -cinnamic acid              | 0.026 $\pm$ 0.013 | 0.010 $\pm$ 0.003 | 0.023 $\pm$ 0.006  | 0.019 $\pm$ 0.004 |
| <i>cis</i> -ferulic acid                 | 0.041 $\pm$ 0.021 | 0.034 $\pm$ 0.007 | 0.044 $\pm$ 0.023  | 0.060 $\pm$ 0.010 |
| <i>trans</i> -ferulic acid               | 0.204 $\pm$ 0.078 | 0.238 $\pm$ 0.021 | 0.212 $\pm$ 0.058  | 0.222 $\pm$ 0.031 |
| <i>cis</i> -sinapic acid                 | 0.041 $\pm$ 0.022 | 0.027 $\pm$ 0.005 | 0.024 $\pm$ 0.013  | 0.049 $\pm$ 0.007 |
| <i>trans</i> -sinapic acid               | 0.186 $\pm$ 0.050 | 0.213 $\pm$ 0.045 | 0.184 $\pm$ 0.019  | 0.169 $\pm$ 0.025 |
| <b>Fatty Acids</b>                       |                   |                   |                    |                   |
| C16:0                                    | 0.138 $\pm$ 0.014 | 0.128 $\pm$ 0.017 | 0.127 $\pm$ 0.022  | 0.142 $\pm$ 0.010 |
| C18:0                                    | 0.037 $\pm$ 0.005 | 0.032 $\pm$ 0.005 | 0.036 $\pm$ 0.008  | 0.040 $\pm$ 0.002 |
| C18:1                                    | 0.013 $\pm$ 0.002 | 0.009 $\pm$ 0.002 | 0.010 $\pm$ 0.002  | 0.010 $\pm$ 0.001 |
| C18:2                                    | 0.057 $\pm$ 0.008 | 0.064 $\pm$ 0.017 | 0.056 $\pm$ 0.011  | 0.051 $\pm$ 0.002 |
| C18:3                                    | 0.047 $\pm$ 0.007 | 0.048 $\pm$ 0.011 | 0.042 $\pm$ 0.006  | 0.050 $\pm$ 0.012 |
| C20:0                                    | 0.032 $\pm$ 0.003 | 0.028 $\pm$ 0.004 | 0.026 $\pm$ 0.003  | 0.028 $\pm$ 0.002 |
| C20:1                                    | 0.036 $\pm$ 0.015 | 0.032 $\pm$ 0.009 | 0.048 $\pm$ 0.025  | 0.057 $\pm$ 0.006 |
| C21:0 methylated                         | 0.016 $\pm$ 0.007 | 0.021 $\pm$ 0.002 | 0.017 $\pm$ 0.004  | 0.018 $\pm$ 0.003 |
| C22:0                                    | 0.036 $\pm$ 0.009 | 0.043 $\pm$ 0.004 | 0.045 $\pm$ 0.008  | 0.043 $\pm$ 0.003 |
| C23:0                                    | 0.008 $\pm$ 0.002 | 0.011 $\pm$ 0.003 | 0.013 $\pm$ 0.004  | 0.010 $\pm$ 0.001 |
| C24:0                                    | 0.096 $\pm$ 0.018 | 0.131 $\pm$ 0.013 | 0.123 $\pm$ 0.026  | 0.125 $\pm$ 0.008 |
| C26:0                                    | 0.031 $\pm$ 0.007 | 0.030 $\pm$ 0.003 | 0.034 $\pm$ 0.003  | 0.030 $\pm$ 0.004 |
| C26:1                                    | 0.027 $\pm$ 0.010 | 0.034 $\pm$ 0.002 | 0.035 $\pm$ 0.009  | 0.029 $\pm$ 0.003 |
| <b>Dicarboxylic Acids</b>                |                   |                   |                    |                   |
| C16:0 DCA                                | 0.049 $\pm$ 0.011 | 0.072 $\pm$ 0.008 | 0.063 $\pm$ 0.024  | 0.070 $\pm$ 0.003 |
| C18:1 DCA                                | 0.145 $\pm$ 0.024 | 0.162 $\pm$ 0.012 | 0.137 $\pm$ 0.035  | 0.146 $\pm$ 0.009 |
| C18:2 DCA                                | 0.166 $\pm$ 0.037 | 0.221 $\pm$ 0.025 | 0.198 $\pm$ 0.035  | 0.179 $\pm$ 0.004 |
| C20:0 DCA                                | 0.015 $\pm$ 0.006 | 0.015 $\pm$ 0.004 | 0.020 $\pm$ 0.008  | 0.012 $\pm$ 0.001 |
| C22:0 DCA                                | 0.111 $\pm$ 0.024 | 0.115 $\pm$ 0.013 | 0.0952 $\pm$ 0.021 | 0.096 $\pm$ 0.005 |
| C23:0 DCA                                | 0.017 $\pm$ 0.008 | 0.017 $\pm$ 0.004 | 0.017 $\pm$ 0.004  | 0.015 $\pm$ 0.001 |
| C24:0 DCA                                | 0.347 $\pm$ 0.098 | 0.383 $\pm$ 0.045 | 0.358 $\pm$ 0.088  | 0.392 $\pm$ 0.023 |
| <b><math>\omega</math>-Hydroxy Acids</b> |                   |                   |                    |                   |
| C16:0 $\omega$ OH                        | 0.043 $\pm$ 0.007 | 0.058 $\pm$ 0.006 | 0.056 $\pm$ 0.009  | 0.062 $\pm$ 0.004 |
| C18:0 $\omega$ OH                        | 0.008 $\pm$ 0.001 | 0.011 $\pm$ 0.001 | 0.010 $\pm$ 0.002  | 0.010 $\pm$ 0.001 |
| C18:1 $\omega$ OH                        | 0.105 $\pm$ 0.011 | 0.113 $\pm$ 0.011 | 0.095 $\pm$ 0.018  | 0.113 $\pm$ 0.006 |
| C18:2 $\omega$ OH                        | 0.062 $\pm$ 0.011 | 0.066 $\pm$ 0.006 | 0.056 $\pm$ 0.005  | 0.052 $\pm$ 0.002 |
| C20:0 $\omega$ OH                        | 0.025 $\pm$ 0.002 | 0.033 $\pm$ 0.006 | 0.034 $\pm$ 0.006  | 0.044 $\pm$ 0.004 |
| C21:0 $\omega$ OH methylated             | 0.050 $\pm$ 0.008 | 0.058 $\pm$ 0.005 | 0.063 $\pm$ 0.013  | 0.064 $\pm$ 0.002 |
| C22:0 $\omega$ OH                        | 0.201 $\pm$ 0.028 | 0.256 $\pm$ 0.025 | 0.209 $\pm$ 0.056  | 0.253 $\pm$ 0.005 |
| C23:0 $\omega$ OH                        | 0.017 $\pm$ 0.006 | 0.019 $\pm$ 0.004 | 0.023 $\pm$ 0.004  | 0.024 $\pm$ 0.005 |
| C23:0 $\omega$ OH methylated             | 0.013 $\pm$ 0.004 | 0.019 $\pm$ 0.003 | 0.024 $\pm$ 0.006  | 0.023 $\pm$ 0.002 |
| C24:0 $\omega$ OH                        | 0.644 $\pm$ 0.089 | 0.713 $\pm$ 0.059 | 0.640 $\pm$ 0.106  | 0.755 $\pm$ 0.030 |
| <b>Mid-Chain Hydroxy Fatty Acids</b>     |                   |                   |                    |                   |
| C16:0 DiOH                               | 0.023 $\pm$ 0.005 | 0.035 $\pm$ 0.008 | 0.026 $\pm$ 0.005  | 0.037 $\pm$ 0.009 |
| C18:1 triOH                              | 0.231 $\pm$ 0.032 | 0.241 $\pm$ 0.040 | 0.204 $\pm$ 0.034  | 0.197 $\pm$ 0.025 |
| <b>2-Hydroxy Acids</b>                   |                   |                   |                    |                   |
| C16:0-2OH                                | 0.018 $\pm$ 0.002 | 0.022 $\pm$ 0.004 | 0.028 $\pm$ 0.007  | 0.023 $\pm$ 0.004 |
| C20:0-2OH                                | 0.008 $\pm$ 0.002 | 0.011 $\pm$ 0.001 | 0.011 $\pm$ 0.003  | 0.010 $\pm$ 0.001 |
| C22:0-2OH                                | 0.034 $\pm$ 0.007 | 0.022 $\pm$ 0.005 | 0.033 $\pm$ 0.005  | 0.028 $\pm$ 0.005 |
| C23:0-2OH                                | 0.016 $\pm$ 0.005 | 0.016 $\pm$ 0.001 | 0.017 $\pm$ 0.002  | 0.016 $\pm$ 0.002 |
| C24:0-2OH                                | 0.093 $\pm$ 0.015 | 0.087 $\pm$ 0.006 | 0.104 $\pm$ 0.014  | 0.103 $\pm$ 0.011 |

**Supplemental Table S3 continued.** *Composition of residual bound lipids in seeds of wild-type, far1-1, far4-1, and far5-1 plants*

Each value is the mean shown in  $\mu\text{g}/\text{mg}$  delipidated dry weight of residue  $\pm$  SD of three biological replicates.

|                     | WT                | <i>far1-1</i>     | <i>far4-1</i>     | <i>far5-1</i>     |
|---------------------|-------------------|-------------------|-------------------|-------------------|
| C25:1-2OH           | 0.014 $\pm$ 0.003 | 0.008 $\pm$ 0.002 | 0.022 $\pm$ 0.008 | 0.013 $\pm$ 0.002 |
| C25:0-2OH           | 0.01 $\pm$ 0.003  | 0.010 $\pm$ 0.001 | 0.018 $\pm$ 0.003 | 0.014 $\pm$ 0.002 |
| C26:0-2OH           | 0.034 $\pm$ 0.011 | 0.039 $\pm$ 0.011 | 0.056 $\pm$ 0.009 | 0.050 $\pm$ 0.005 |
| C26:1-2OH           | 0.025 $\pm$ 0.005 | 0.027 $\pm$ 0.009 | 0.040 $\pm$ 0.006 | 0.031 $\pm$ 0.006 |
| Fatty Alcohols      |                   |                   |                   |                   |
| C18:0-OH            | 0.045 $\pm$ 0.006 | 0.047 $\pm$ 0.006 | 0.032 $\pm$ 0.007 | 0.004 $\pm$ 0.001 |
| C19:0-OH            | 0.016 $\pm$ 0.008 | 0.011 $\pm$ 0.003 | 0.008 $\pm$ 0.002 | 0.004 $\pm$ 0.002 |
| C20:0-OH            | 0.061 $\pm$ 0.010 | 0.058 $\pm$ 0.007 | 0.025 $\pm$ 0.003 | 0.068 $\pm$ 0.003 |
| C21:0-OH methylated | 0.033 $\pm$ 0.004 | 0.012 $\pm$ 0.001 | 0.024 $\pm$ 0.004 | 0.028 $\pm$ 0.003 |
| C22:0-OH            | 0.219 $\pm$ 0.022 | 0.077 $\pm$ 0.008 | 0.232 $\pm$ 0.049 | 0.227 $\pm$ 0.018 |
| C23:0-OH            | 0.018 $\pm$ 0.003 | 0.013 $\pm$ 0.001 | 0.023 $\pm$ 0.005 | 0.021 $\pm$ 0.002 |
| C20:0 diOL          | 0.026 $\pm$ 0.005 | 0.022 $\pm$ 0.007 | 0.013 $\pm$ 0.005 | 0.021 $\pm$ 0.005 |
| C22:0 diOL          | 0.169 $\pm$ 0.026 | 0.070 $\pm$ 0.004 | 0.201 $\pm$ 0.044 | 0.180 $\pm$ 0.014 |
| Unknowns            | 0.208 $\pm$ 0.022 | 0.271 $\pm$ 0.010 | 0.266 $\pm$ 0.027 | 0.230 $\pm$ 0.024 |
| Total               | 4.46 $\pm$ 0.37   | 4.56 $\pm$ 0.41   | 4.70 $\pm$ 0.25   | 4.68 $\pm$ 0.19   |

**Supplemental Table S4.** Composition of residual bound lipids in unwounded and wounded leaves of wild-type, *far1-1*, *far4-1*, and *far5-1*Each value is the mean shown in  $\mu\text{g}/\text{mg}$  delipidated dry weight of residue  $\pm$  SD of five biological replicates.

(-) denotes unwounded leaves, (+) denotes wounded leaves

|                                          | WT (-)            | WT (+)            | <i>far1-1</i> (-) | <i>far1-1</i> (+) | <i>far4-1</i> (-) | <i>far4-1</i> (+) | <i>far5-1</i> (-) | <i>far5-1</i> (+) |
|------------------------------------------|-------------------|-------------------|-------------------|-------------------|-------------------|-------------------|-------------------|-------------------|
| <b>Fatty Acids</b>                       |                   |                   |                   |                   |                   |                   |                   |                   |
| C16:0                                    | 0.843 $\pm$ 0.114 | 1.100 $\pm$ 0.034 | 0.900 $\pm$ 0.190 | 1.248 $\pm$ 0.179 | 0.701 $\pm$ 0.128 | 0.858 $\pm$ 0.210 | 0.847 $\pm$ 0.089 | 0.968 $\pm$ 0.149 |
| C18:0                                    | 0.100 $\pm$ 0.043 | 0.120 $\pm$ 0.014 | 0.107 $\pm$ 0.041 | 0.136 $\pm$ 0.087 | 0.061 $\pm$ 0.014 | 0.086 $\pm$ 0.025 | 0.091 $\pm$ 0.017 | 0.126 $\pm$ 0.009 |
| C18:1                                    | 0.043 $\pm$ 0.022 | 0.027 $\pm$ 0.010 | 0.049 $\pm$ 0.023 | 0.032 $\pm$ 0.024 | 0.031 $\pm$ 0.022 | 0.030 $\pm$ 0.024 | 0.028 $\pm$ 0.006 | 0.039 $\pm$ 0.009 |
| C18:2                                    | 0.176 $\pm$ 0.112 | 0.181 $\pm$ 0.043 | 0.139 $\pm$ 0.046 | 0.212 $\pm$ 0.087 | 0.128 $\pm$ 0.018 | 0.173 $\pm$ 0.083 | 0.117 $\pm$ 0.048 | 0.175 $\pm$ 0.010 |
| C18:3                                    | 0.301 $\pm$ 0.193 | 0.281 $\pm$ 0.099 | 0.283 $\pm$ 0.089 | 0.349 $\pm$ 0.091 | 0.225 $\pm$ 0.105 | 0.243 $\pm$ 0.031 | 0.231 $\pm$ 0.092 | 0.303 $\pm$ 0.014 |
| C20:0                                    | 0.048 $\pm$ 0.005 | 0.092 $\pm$ 0.022 | 0.053 $\pm$ 0.012 | 0.084 $\pm$ 0.021 | 0.035 $\pm$ 0.005 | 0.096 $\pm$ 0.023 | 0.050 $\pm$ 0.010 | 0.140 $\pm$ 0.021 |
| C22:0                                    | 0.078 $\pm$ 0.009 | 0.178 $\pm$ 0.034 | 0.109 $\pm$ 0.027 | 0.153 $\pm$ 0.026 | 0.055 $\pm$ 0.011 | 0.182 $\pm$ 0.054 | 0.112 $\pm$ 0.036 | 0.271 $\pm$ 0.030 |
| C23:0                                    | 0.030 $\pm$ 0.025 | 0.032 $\pm$ 0.015 | 0.030 $\pm$ 0.006 | 0.027 $\pm$ 0.009 | 0.025 $\pm$ 0.011 | 0.026 $\pm$ 0.012 | 0.036 $\pm$ 0.005 | 0.031 $\pm$ 0.005 |
| C24:0                                    | 0.156 $\pm$ 0.050 | 0.185 $\pm$ 0.026 | 0.251 $\pm$ 0.096 | 0.191 $\pm$ 0.029 | 0.167 $\pm$ 0.052 | 0.181 $\pm$ 0.049 | 0.238 $\pm$ 0.087 | 0.223 $\pm$ 0.059 |
| C24:1                                    | 0.029 $\pm$ 0.012 | 0.028 $\pm$ 0.011 | 0.038 $\pm$ 0.015 | 0.042 $\pm$ 0.008 | 0.019 $\pm$ 0.006 | 0.023 $\pm$ 0.009 | 0.040 $\pm$ 0.010 | 0.026 $\pm$ 0.010 |
| C25:0                                    | 0.030 $\pm$ 0.007 | 0.037 $\pm$ 0.008 | 0.047 $\pm$ 0.008 | 0.036 $\pm$ 0.005 | 0.030 $\pm$ 0.013 | 0.036 $\pm$ 0.014 | 0.035 $\pm$ 0.002 | 0.034 $\pm$ 0.009 |
| C26:0                                    | 0.046 $\pm$ 0.010 | 0.050 $\pm$ 0.010 | 0.089 $\pm$ 0.038 | 0.065 $\pm$ 0.027 | 0.046 $\pm$ 0.017 | 0.053 $\pm$ 0.007 | 0.081 $\pm$ 0.040 | 0.065 $\pm$ 0.022 |
| C28:0                                    | 0.020 $\pm$ 0.005 | 0.017 $\pm$ 0.004 | 0.033 $\pm$ 0.018 | 0.022 $\pm$ 0.010 | 0.013 $\pm$ 0.004 | 0.014 $\pm$ 0.003 | 0.025 $\pm$ 0.012 | 0.022 $\pm$ 0.014 |
| <b>Dicarboxylic Acids</b>                |                   |                   |                   |                   |                   |                   |                   |                   |
| C16:0 DCA                                | 0.226 $\pm$ 0.025 | 0.211 $\pm$ 0.045 | 0.241 $\pm$ 0.075 | 0.213 $\pm$ 0.048 | 0.194 $\pm$ 0.089 | 0.246 $\pm$ 0.072 | 0.261 $\pm$ 0.038 | 0.295 $\pm$ 0.075 |
| C18:0 DCA                                | 0.086 $\pm$ 0.031 | 0.111 $\pm$ 0.049 | 0.102 $\pm$ 0.047 | 0.114 $\pm$ 0.033 | 0.068 $\pm$ 0.044 | 0.110 $\pm$ 0.035 | 0.088 $\pm$ 0.022 | 0.139 $\pm$ 0.003 |
| C18:1 DCA                                | 0.150 $\pm$ 0.103 | 0.168 $\pm$ 0.074 | 0.167 $\pm$ 0.051 | 0.153 $\pm$ 0.031 | 0.118 $\pm$ 0.082 | 0.156 $\pm$ 0.077 | 0.158 $\pm$ 0.034 | 0.190 $\pm$ 0.048 |
| C18:2 DCA                                | 0.696 $\pm$ 0.137 | 0.690 $\pm$ 0.062 | 0.715 $\pm$ 0.092 | 0.665 $\pm$ 0.141 | 0.647 $\pm$ 0.082 | 0.710 $\pm$ 0.129 | 0.686 $\pm$ 0.162 | 0.784 $\pm$ 0.118 |
| <b><math>\omega</math>-Hydroxy Acids</b> |                   |                   |                   |                   |                   |                   |                   |                   |
| 16:0 $\omega$ OH                         | 0.031 $\pm$ 0.011 | 0.044 $\pm$ 0.006 | 0.037 $\pm$ 0.004 | 0.048 $\pm$ 0.014 | 0.030 $\pm$ 0.006 | 0.054 $\pm$ 0.009 | 0.029 $\pm$ 0.002 | 0.074 $\pm$ 0.018 |
| 18:2 $\omega$ OH                         | 0.071 $\pm$ 0.034 | 0.097 $\pm$ 0.032 | 0.096 $\pm$ 0.011 | 0.105 $\pm$ 0.009 | 0.051 $\pm$ 0.029 | 0.088 $\pm$ 0.052 | 0.080 $\pm$ 0.018 | 0.133 $\pm$ 0.015 |
| 20:0 $\omega$ OH                         | 0.004 $\pm$ 0.005 | 0.026 $\pm$ 0.006 | 0.008 $\pm$ 0.003 | 0.024 $\pm$ 0.008 | 0.005 $\pm$ 0.002 | 0.031 $\pm$ 0.010 | 0.008 $\pm$ 0.002 | 0.045 $\pm$ 0.007 |
| 22:0 $\omega$ OH                         | 0.010 $\pm$ 0.006 | 0.041 $\pm$ 0.009 | 0.017 $\pm$ 0.006 | 0.036 $\pm$ 0.008 | 0.009 $\pm$ 0.005 | 0.041 $\pm$ 0.014 | 0.015 $\pm$ 0.001 | 0.064 $\pm$ 0.002 |
| 16:0 diOH                                | 0.087 $\pm$ 0.016 | 0.069 $\pm$ 0.017 | 0.100 $\pm$ 0.023 | 0.088 $\pm$ 0.020 | 0.095 $\pm$ 0.039 | 0.071 $\pm$ 0.025 | 0.097 $\pm$ 0.007 | 0.079 $\pm$ 0.008 |
| <b>2-Hydroxy Acids</b>                   |                   |                   |                   |                   |                   |                   |                   |                   |
| C16:0-2OH                                | 0.059 $\pm$ 0.033 | 0.062 $\pm$ 0.019 | 0.051 $\pm$ 0.011 | 0.050 $\pm$ 0.008 | 0.035 $\pm$ 0.004 | 0.043 $\pm$ 0.002 | 0.041 $\pm$ 0.014 | 0.049 $\pm$ 0.010 |
| C20:0-2OH                                | 0.035 $\pm$ 0.026 | 0.038 $\pm$ 0.018 | 0.029 $\pm$ 0.011 | 0.019 $\pm$ 0.006 | 0.024 $\pm$ 0.013 | 0.034 $\pm$ 0.005 | 0.022 $\pm$ 0.013 | 0.032 $\pm$ 0.014 |
| C22:0-2OH                                | 0.125 $\pm$ 0.047 | 0.131 $\pm$ 0.021 | 0.145 $\pm$ 0.074 | 0.104 $\pm$ 0.022 | 0.080 $\pm$ 0.022 | 0.093 $\pm$ 0.009 | 0.111 $\pm$ 0.042 | 0.094 $\pm$ 0.053 |
| C23:0-2OH                                | 0.033 $\pm$ 0.019 | 0.034 $\pm$ 0.013 | 0.034 $\pm$ 0.004 | 0.027 $\pm$ 0.003 | 0.020 $\pm$ 0.005 | 0.022 $\pm$ 0.007 | 0.023 $\pm$ 0.006 | 0.021 $\pm$ 0.009 |
| C23:1-2OH                                | 0.029 $\pm$ 0.003 | 0.028 $\pm$ 0.007 | 0.026 $\pm$ 0.006 | 0.026 $\pm$ 0.014 | 0.017 $\pm$ 0.008 | 0.017 $\pm$ 0.006 | 0.026 $\pm$ 0.010 | 0.024 $\pm$ 0.027 |
| C24:0-2OH                                | 0.467 $\pm$ 0.087 | 0.483 $\pm$ 0.113 | 0.480 $\pm$ 0.148 | 0.446 $\pm$ 0.068 | 0.398 $\pm$ 0.123 | 0.389 $\pm$ 0.027 | 0.444 $\pm$ 0.141 | 0.411 $\pm$ 0.182 |
| C24:1-2OH                                | 0.160 $\pm$ 0.068 | 0.144 $\pm$ 0.023 | 0.212 $\pm$ 0.100 | 0.195 $\pm$ 0.037 | 0.171 $\pm$ 0.073 | 0.153 $\pm$ 0.044 | 0.212 $\pm$ 0.055 | 0.146 $\pm$ 0.063 |
| C25:0-2OH                                | 0.039 $\pm$ 0.026 | 0.043 $\pm$ 0.020 | 0.043 $\pm$ 0.008 | 0.040 $\pm$ 0.006 | 0.022 $\pm$ 0.011 | 0.026 $\pm$ 0.009 | 0.030 $\pm$ 0.006 | 0.032 $\pm$ 0.014 |
| C25:1-2OH                                | 0.025 $\pm$ 0.014 | 0.025 $\pm$ 0.003 | 0.022 $\pm$ 0.005 | 0.027 $\pm$ 0.013 | 0.017 $\pm$ 0.015 | 0.014 $\pm$ 0.014 | 0.020 $\pm$ 0.003 | 0.014 $\pm$ 0.024 |
| C26:0-2OH                                | 0.108 $\pm$ 0.069 | 0.112 $\pm$ 0.037 | 0.150 $\pm$ 0.047 | 0.115 $\pm$ 0.037 | 0.085 $\pm$ 0.034 | 0.084 $\pm$ 0.010 | 0.105 $\pm$ 0.045 | 0.103 $\pm$ 0.055 |
| C26:1-2OH                                | 0.024 $\pm$ 0.010 | 0.021 $\pm$ 0.006 | 0.027 $\pm$ 0.010 | 0.023 $\pm$ 0.002 | 0.019 $\pm$ 0.018 | 0.019 $\pm$ 0.010 | 0.024 $\pm$ 0.003 | 0.019 $\pm$ 0.015 |
| <b>Fatty Alcohols</b>                    |                   |                   |                   |                   |                   |                   |                   |                   |
| 18:0-OH                                  | 0.024 $\pm$ 0.006 | 0.041 $\pm$ 0.003 | 0.025 $\pm$ 0.012 | 0.048 $\pm$ 0.022 | 0.020 $\pm$ 0.003 | 0.069 $\pm$ 0.029 | 0.013 $\pm$ 0.004 | 0.013 $\pm$ 0.004 |
| 20:0-OH                                  | 0.054 $\pm$ 0.015 | 0.087 $\pm$ 0.029 | 0.054 $\pm$ 0.024 | 0.076 $\pm$ 0.025 | 0.036 $\pm$ 0.013 | 0.050 $\pm$ 0.030 | 0.056 $\pm$ 0.017 | 0.078 $\pm$ 0.020 |
| 22:0-OH                                  | 0.034 $\pm$ 0.007 | 0.055 $\pm$ 0.007 | 0.029 $\pm$ 0.007 | 0.028 $\pm$ 0.013 | 0.028 $\pm$ 0.015 | 0.050 $\pm$ 0.028 | 0.041 $\pm$ 0.006 | 0.082 $\pm$ 0.026 |
| Unknowns                                 | 0.182 $\pm$ 0.050 | 0.172 $\pm$ 0.034 | 0.258 $\pm$ 0.077 | 0.235 $\pm$ 0.058 | 0.166 $\pm$ 0.074 | 0.185 $\pm$ 0.159 | 0.188 $\pm$ 0.010 | 0.274 $\pm$ 0.025 |
| Total                                    | 4.88 $\pm$ 1.66   | 5.28 $\pm$ 0.96   | 5.34 $\pm$ 1.01   | 5.58 $\pm$ 1.02   | 4.02 $\pm$ 1.35   | 4.78 $\pm$ 1.62   | 4.80 $\pm$ 0.87   | 5.49 $\pm$ 0.25   |



| <b>Supplemental Table S5. Sequences of DNA primers used for PCR</b> |                                                         |
|---------------------------------------------------------------------|---------------------------------------------------------|
| <b>Primer Name</b>                                                  | <b>Primer sequence</b>                                  |
| FAR1-qPCR-F                                                         | ACAGCTCATTCGGGAGACAC                                    |
| FAR1-qPCR-R                                                         | GTAACGAGCCGTGAAATCGT                                    |
| FAR2-qPCR-F                                                         | TGGATTTGATGTTGGAAGCA                                    |
| FAR2-qPCR-R                                                         | GGGATCGATTCTGTTTGGTC                                    |
| FAR3-qPCR-F                                                         | ACCGTGGACCAACAAAGAAG                                    |
| FAR3-qPCR-R                                                         | GCAATCAAGTAGCGTATGGTCA                                  |
| FAR4-qPCR-F                                                         | TGCGGTTGAAAAGAAAGGAG                                    |
| FAR4-qPCR-R                                                         | CGGGAATATGAATGGTCGTC                                    |
| FAR5-qPCR-F                                                         | GAGTTGGTGATGAGATTGGTAGAG                                |
| FAR5-qPCR-R                                                         | CTTCTTAAGCACGTGTGTGACG                                  |
| FAR6-qPCR-F                                                         | TGTGGTGTCCCAGAGTTCAA                                    |
| FAR6-qPCR-R                                                         | TCCAATGGAAAGTCACACAGA                                   |
| FAR7-qPCR-F                                                         | CAGTTTACCATGTCCGGCTCA                                   |
| FAR7-qPCR-R                                                         | CCATTACGTCCGACAAGAGG                                    |
| FAR8-qPCR-F                                                         | GCCAAGCAGAAAGAAGAGGA                                    |
| FAR8-qPCR-R                                                         | AGTGATGAGGCCAGGAATGT                                    |
| FAR1-Pro-F                                                          | AGAGGTGCGACGAAGCATCATTGGAGATGGTC                        |
| FAR1-Pro-R                                                          | AGAGGATCCTTGAACACAATTGGATTCCATTG                        |
| FAR4-Pro-F                                                          | AGAGTCGACCCCTTCTTGAAGGTCAAGCCT                          |
| FAR4-Pro-R                                                          | AGAGGATCCCTGAATGCAATTGGAGTCCAT                          |
| FAR5-Pro-F                                                          | AGAGTCGACTGAAGTTGATCAGGTTGACAAT                         |
| FAR5-Pro-R                                                          | AGAGCATCCTTCAACACAATTGAGTTCCATTG                        |
| FAR1-RT-F                                                           | CTACGTAGTGAGGTTATGGAGATCG                               |
| FAR1-RT-R                                                           | CGCTTATATACGCGGTTGAGACATG                               |
| FAR4-RT-F                                                           | CTTGGAATGTCAAGGGCAAAGCTTC                               |
| FAR4-RT-R                                                           | TGTCCACAGGTATAAGATCAAGGAC                               |
| FAR5-RT-F                                                           | CGCACAGAGGTATTTGAGAAAGAAC                               |
| FAR5-RT-R                                                           | CAAGCCCAACATCATATCTTTCGTC                               |
| GAPC-RT-F                                                           | TCAGACTCGAGAAAGCTGCTAC                                  |
| GAPC-RT-R                                                           | GATCAAGTCGACCACACGG                                     |
| FAR1-ORF-F                                                          | AAAAAGCAGGCTACATAATGGAATCCAATTGTGTTCAATTTCTCGG          |
| FAR1-ORF-R                                                          | AGAAAGCTGGGTATTATGTTTAAAGCACATGGGTGATGAGGCCAGGAATGTGGG  |
| FAR3-ORF-F                                                          | AAAAAGCAGGCTACATAATGTGACAGAAATGGAGGTCG                  |
| FAR3-ORF-R                                                          | AGAAAGCTGGGTACTCGAGTTAGAAGACATACTTAAGCAGCCC             |
| FAR4-ORF-F                                                          | AAAAAGCAGGCTACATAATGGACTCCAATTGCATTTCAGTTCTCC           |
| FAR4-ORF-R                                                          | AGAAAGCTGGGTATTATTTTTGAGTACATAGGTGATGAGGCCGG            |
| FAR5-ORF-F                                                          | AAAAAGCAGGCTACATAATGGAATCAATTGTGTTCAATTTCTTCGAAACAAGACG |
| FAR5-ORF-R                                                          | AGAAAGCTGGGCTATCACTTCTTAAGCACGTGTGTGACGAGTCC            |

| <b>Supplemental Table S5 continued. Sequences of DNA primers used for PCR</b> |                               |
|-------------------------------------------------------------------------------|-------------------------------|
| <b>Primer Name</b>                                                            | <b>Primer sequence</b>        |
| SALK_068605-TDNA-LP                                                           | CAAGGTTTGCAGCCTAGTCAC         |
| SALK_068605-TDNA-RP                                                           | TGTTACAACACTGTTGCGGTG         |
| SALK_149469-TDNA-LP                                                           | TGTTGCAATAAATGAAATGAACAG      |
| SALK_149469-TDNA-RP                                                           | TACCTTGCACGACTATGTCCC         |
| SALK_000229-TDNA-LP                                                           | TGTATTCATCAAACCAATTGATCC      |
| SALK_000229-TDNA-RP                                                           | TTGCGATGGTGAACACTTCC          |
| SALK_147493-TDNA-LP                                                           | GTTGACCCGCTTCTTCTCTC          |
| SALK_147493-TDNA-RP                                                           | AAACCAAATGTTGAAAGAGAAAAC      |
| SALK_152963-TDNA-LP                                                           | TTCTTGCAACGCCTTAGCTG          |
| SALK_152963-TDNA-RP                                                           | AAAGGTGGTATATAAAAATTTCTTGTAGC |
| SALK_070363-TDNA-LP                                                           | AAAGAACTCGGAATGGAAAGG         |
| SALK_070363-TDNA-RP                                                           | GGGCAAATTAGCTTAAGTACGC        |
| LBb1                                                                          | GCGTGGACCGCTTGCTGCAACT        |
